# Supplementary material
Source: PubMed Central journal article supplement (PMC4836361)
Supplement: JVI.01617-15_zjv999091604so1.pdf [file JVI.01617-15_zjv999091604so1.pdf]

**TABLE S1. Biotinylated Probe Library**

| Probe ID | Sequence                                                                  |
|----------|---------------------------------------------------------------------------|
| CON_1    | ATCCTTGATCTGTGGGTCTACCACACACAAGGCTTCTCCCTGATTGGCAGAACTACACACCAGGGCCAGGG   |
| CON_2    | ATTCTTGATTTGTGGGTCTATCACACACAAGGCTACTTCCCTGATTGGCAGAACTACACACCAGGGCCAGGG  |
| CON_3    | ATTCTTGATCTGTGGGTTTATAATACACAAGGTTACTTCCCTGACTGGCAGAACTACACCCAGGGCCAGGG   |
| CON_4    | ATTCTTGATCTGTGGGTCTATCACACACAAGGTTTCTTCCCTGATTGGGATAACTACACACCAGGACCAGGG  |
| CON_5    | ATCCTTGATCTGTGGGTCTATCACACACAAGGCTACTTCCCTGATTGGCAGAACTACACACCAGGGCCAGGG  |
| CON_6    | ATCCTTGATCTGTGGGTCTACCACACACAAGGCTACTTCCCTGATTGGCAGAACTACACACCAGGGCCAGGG  |
| CON_7    | ATCCTTGATTTGTGGATCTACAACACACAAGGCTACTTCCCTGATTGGCAGAACTACACACCAGGGCCAGGG  |
| CON_8    | ATCCTTGATCTATGGGTCTATCACACACAAGGCTACTTCCCTGATTGGCAGAATTACACACCAGGGCCAGGG  |
| CON_9    | ATCCTTGATTTGTGGGTCTACCACACACAAGGCTACTTCCCTGATTGGCAGAACTACACACCAGGGCCAGGG  |
| CON_10   | ATCCTTGATCTGTGGGTCTACAACACACAAGGCTACTTCCCTGACTGGCAGAACTACACACCAGGACCAGGG  |
| CON_11   | ATCCTTGATTTGTGGGTCTATCACACACAAGGCTTCTTCCCTGATTGGCAAACTACACACCGGGACCAGGG   |
| CON_12   | ATCCTTGATCTGTGGGTCTACCACACACAAGGCTACTTCCCTGACTGGCAGAACTACACACCAGGGCCAGGG  |
| CON_13   | ATCCTTGATCTGTGGGTCTACCACACACAAGGCTTCTTCCCTGATTGGCAGTGCTACACACCAGGGCCAGGG  |
| CON_14   | ATCCTTGATCTGTGGGTCTACAACACACAAGGCTACTTCCCTGATTGGCAGAATTACACACCAGGGCCAGGG  |
| CON_15   | ATCCTTGATCTGTGGATCTACCACACACAAGGCTACTTCCCTGATTGGCAGAACTACACACCAGGGCCAGGG  |
| CON_16   | ATCCTTGATCTGTGGGTTTACAACACACAAGGCTACTTCCCTGATTGGCAGAACTACACACCAGGGCCAGGG  |
| CON_17   | ATCCTTGATCTGTGGGTCTATCATAACAAGGCTACTTCCCTGATTGGGAGAACTACACACCAGGGCCAGGG   |
| CON_18   | ATCCTTGATCTGTGGATCTATCACACACAAGGCTACTTCCCTGATTGGCAGAACTACACACCAGGGCCAGGG  |
| CON_19   | ATCCTTGATCTGTGGGTCTACCACACACAAGGCTTCTTCCCTGATTGGCAGAATTACACACCAGGGCCAGGG  |
| CON_20   | ATCCTTGATCTGTGGGTCTACAACACACAAGGCTTCTTCCCTGATTGGCAGAACTACACACCAGGGCCAGGG  |
| CON_21   | ATCCTTGATCTGTGGGTCTTTAACACACAGGGCTTCTTCCCTGATTGGCACAACTACACACCAGGGCCAGGG  |
| CON_22   | ATCCTTGATCTGTGGGTCTACCACACACAAGGCTACTTCCCTGATTGGCATAATTACACACCAGGGCCAGGG  |
| CON_23   | ATCCTTGATCTGTGGGTCTACCACACACAAGGATACTTCCCTGATTGGCAAACTACACACCAGGGCCAGGG   |
| CON_24   | ATCCTTGATCTGTGGGTCTACAACACACAAGGCTTCTTCCCTGACTGGCAGAACTACACACCAGGGCCAGGG  |
| CON_25   | ATCCTTGATCTGTGGGTCTACCACACGCAAGGCTACTTCCCTGATTGGCAGAACTACACACCAGGGCCAGGG  |
| CON_26   | ATCCTTGATCTGTGGGTCTACCACACACAGGGCATCTTCCCTGACTGGGATAATTACACACCAGGGCCAGGG  |
| CON_27   | ATCCTTGATCTGTGGGTCTACAACACACAAGGCTATTCCCTGATTGGCAGAACTACACACCAGGGCCAGGG   |
| CON_28   | ATCCTTGATCTGTGGGTCTACAACACACAGGGCTACTTCCCTGATTGGCAGAACTACACTAAAGGGCCAGGG  |
| CON_29   | ATCCTTGATCTGTGGGTCTACAACACACAAGGCTACTTCCCTGATTGGCAGAATTACACAGAGGGGCCAGGA  |
| CON_30   | ATCCTTGATCTGTGGGTCTACCACACACAAGGTTACTTCCCTGACTGGCAAACTACACACCAGGGCCAGGG   |
| CON_31   | ATCCTTGATCTGTGGATTTACCACACACAAGGCTACTTCCCTGATTGGCAGAACTACACACCAGGGCCAGGG  |
| CON_32   | ATCCTTGATCTGTGGATCTACCACACACAAGGCTACTTCCCTGATTGGCAGAATTACACACCAGGGCCAGGG  |
| CON_33   | ATCCTTGATCTGTGGATCTACCACACACAAGGCTACTTCCCTGATTGGGGTAACTACACACCAGGGCCAGGG  |
| CON_34   | ATCCTTGATCTGTGGATCTACCACACACAAGGATACTTCCCTGACTGGCAGAACTACACACCAGGGCCAGGG  |
| CON_35   | ATCCTTGATCTATGGGTCTATAATACACAAGGCTACTTCCCTGATTGGCAGAATTACACACCAGGACCAGGG  |
| CON_36   | ATCCTTGATCTATGGGTCTACAACACGCAAGGCTTCTTCCCTGATTGGCAGAACTACACACCAGGGCCAGGG  |
| CON_37   | ATCCTTGATCTATGGATCTACCACACACAAGGCTACTTCCCTGATTGGCAGAACTACACACCAGGGCCAGGG  |
| CON_38   | ATCCTTGATCTATGGATCTACCACACACAAGGCTACTTCCCTGACTGGCAGTGCTACACACCAGGGCCAGGG  |
| CON_39   | ATCCTTGATATGTGGGTCTATCATAACGCAAGGCTACTTCCCTGATTGGCAGAACTACACACCAGGGCCAGGG |
| CON_40   | ATCCTTGATATGTGGATCTACCATAACAAGGCTACTTCCCTGATTGGCAGAGCTACACCCAGGACCAGGG    |
| CON_41   | ATCCTTGACCTGTGGGTCCACCACACACAAGGCTTCTTCCCTGATTGGCAAGGCTACACACCAGGGCCAGGG  |
| CON_42   | ATCCTTGACCTGTGGATCTACCACACACAAGGCTACTTCCCTGATTGGCAGAACTACACACCAGGGCCAGGA  |
| CON_43   | ATCCTTGACCTTTGGGTCTACAACACACAAGGTTACTTCCCTGATTGGCAGAACTACACACCAGGGCCAGGG  |
| CON_44   | ATCCTTGACCTGTGGGTCTACCACACACAAGGCTACTTCCCTGATTGGCAGAATTACACACCAGGGCCAGGG  |
| CON_45   | ATCCTTGACCTGTGGCTCTACCACACGGAAGGCTACTTCCCTGACTGGCAGAACTACACACCAGGACCAGGG  |
| CON_46   | ATCCTTAATCTGTGGGTCTACCACACGCAAGGCTTCTTCCCAGATTGGCATAACTACACACCAGGGCCAGGG  |
| CON_47   | ATCCTGGATCTGTGGGTCTACCACACACAAGGTTACTTCCCTGATTGGCAGAACTACACAAGAGGGCCAGGG  |
| CON_48   | ATCCTCGATCTGTGGGTTTACCACACACAAGGCTACTTCCCTGATTGGCAGAACTACACACCAGGGCCAGGA  |
| CON_49   | ATCCTAGATCTGTGGGTCTACCACACACAAGGATACTTCCCTGATTGGCAAACTACACACAGTGGGCCAGGG  |
| CON_50   | ATACTTGATCTGTGGGTCTACAACACACAAGGCTACTTCCCCGATTGGCAGAACTACACACCAGGGCCAGGG  |
| CON_51   | ATCCTTGATCTGTGGGTTTACCACACACAAGGCTACTTCCCTGATTGGCAGAACTACACACCAGGACCAGGG  |
| CON_52   | ATCCTTGATCTGTGGGTCCATCACACACAAGGATACTTCCCTGATTGGCAGAACTACACACCAGGGCCAGGG  |

Fifty-two probes with a length of 72 base pairs were used to enrich Illumina libraries for HIV sequences.

**TABLE S2. HIV Insertion Sites**

| Samples            | Insertion Site |           |
|--------------------|----------------|-----------|
|                    | Chr            | Pos       |
| ACH-2 Bulk Culture | chr1           | 3544930   |
| ACH-2 Bulk Culture | chr1           | 3576231   |
| ACH-2 Bulk Culture | chr1           | 16230028  |
| ACH-2 Bulk Culture | chr1           | 26623224  |
| ACH-2 Bulk Culture | chr1           | 26623286  |
| ACH-2 Bulk Culture | chr1           | 28086902  |
| ACH-2 Bulk Culture | chr1           | 35570010  |
| ACH-2 Bulk Culture | chr1           | 37184180  |
| ACH-2 Bulk Culture | chr1           | 40340365  |
| ACH-2 Bulk Culture | chr1           | 46370030  |
| ACH-2 Bulk Culture | chr1           | 48018967  |
| ACH-2 Bulk Culture | chr1           | 51960821  |
| ACH-2 Bulk Culture | chr1           | 52969475  |
| ACH-2 Bulk Culture | chr1           | 53419275  |
| ACH-2 Bulk Culture | chr1           | 63837723  |
| ACH-2 Bulk Culture | chr1           | 92772407  |
| ACH-2 Bulk Culture | chr1           | 93676532  |
| ACH-2 Bulk Culture | chr1           | 100886731 |
| ACH-2 Bulk Culture | chr1           | 110842271 |
| ACH-2 Bulk Culture | chr1           | 145657660 |
| ACH-2 Bulk Culture | chr1           | 150073817 |
| ACH-2 Bulk Culture | chr1           | 151510013 |
| ACH-2 Bulk Culture | chr1           | 155401988 |
| ACH-2 Bulk Culture | chr1           | 155433046 |
| ACH-2 Bulk Culture | chr1           | 162831909 |
| ACH-2 Bulk Culture | chr1           | 162832005 |
| ACH-2 Bulk Culture | chr1           | 168448029 |
| ACH-2 Bulk Culture | chr1           | 194175208 |
| ACH-2 Bulk Culture | chr1           | 199434782 |
| ACH-2 Bulk Culture | chr2           | 10023107  |
| ACH-2 Bulk Culture | chr2           | 28197057  |
| ACH-2 Bulk Culture | chr2           | 28325877  |
| ACH-2 Bulk Culture | chr2           | 55437549  |
| ACH-2 Bulk Culture | chr2           | 97866505  |
| ACH-2 Bulk Culture | chr2           | 113074525 |
| ACH-2 Bulk Culture | chr2           | 119145161 |
| ACH-2 Bulk Culture | chr2           | 202244018 |
| ACH-2 Bulk Culture | chr3           | 14999628  |

| Samples            | Insertion Site |           |
|--------------------|----------------|-----------|
|                    | Chr            | Pos       |
| ACH-2 Bulk Culture | chr3           | 15258380  |
| ACH-2 Bulk Culture | chr3           | 17350595  |
| ACH-2 Bulk Culture | chr3           | 18394154  |
| ACH-2 Bulk Culture | chr3           | 30671450  |
| ACH-2 Bulk Culture | chr3           | 42879105  |
| ACH-2 Bulk Culture | chr3           | 47480085  |
| ACH-2 Bulk Culture | chr3           | 47706361  |
| ACH-2 Bulk Culture | chr3           | 47739837  |
| ACH-2 Bulk Culture | chr3           | 48973229  |
| ACH-2 Bulk Culture | chr3           | 50135266  |
| ACH-2 Bulk Culture | chr3           | 53158705  |
| ACH-2 Bulk Culture | chr3           | 76818339  |
| ACH-2 Bulk Culture | chr3           | 81181871  |
| ACH-2 Bulk Culture | chr3           | 94405205  |
| ACH-2 Bulk Culture | chr3           | 108649768 |
| ACH-2 Bulk Culture | chr3           | 110059980 |
| ACH-2 Bulk Culture | chr3           | 116877694 |
| ACH-2 Bulk Culture | chr3           | 120265488 |
| ACH-2 Bulk Culture | chr3           | 120427470 |
| ACH-2 Bulk Culture | chr3           | 140689567 |
| ACH-2 Bulk Culture | chr3           | 141238172 |
| ACH-2 Bulk Culture | chr3           | 147546558 |
| ACH-2 Bulk Culture | chr3           | 187615232 |
| ACH-2 Bulk Culture | chr3           | 188211722 |
| ACH-2 Bulk Culture | chr3           | 188211823 |
| ACH-2 Bulk Culture | chr3           | 197022112 |
| ACH-2 Bulk Culture | chr4           | 16252727  |
| ACH-2 Bulk Culture | chr4           | 48611148  |
| ACH-2 Bulk Culture | chr4           | 78647989  |
| ACH-2 Bulk Culture | chr4           | 134206344 |
| ACH-2 Bulk Culture | chr4           | 134721272 |
| ACH-2 Bulk Culture | chr4           | 160050755 |
| ACH-2 Bulk Culture | chr4           | 174305720 |
| ACH-2 Bulk Culture | chr4           | 180758749 |
| ACH-2 Bulk Culture | chr4           | 188215027 |
| ACH-2 Bulk Culture | chr5           | 654848    |
| ACH-2 Bulk Culture | chr5           | 1279242   |
| ACH-2 Bulk Culture | chr5           | 31317264  |

| Samples            | Insertion Site |           |
|--------------------|----------------|-----------|
|                    | Chr            | Pos       |
| ACH-2 Bulk Culture | chr5           | 31317510  |
| ACH-2 Bulk Culture | chr5           | 39272908  |
| ACH-2 Bulk Culture | chr5           | 43686749  |
| ACH-2 Bulk Culture | chr5           | 51803167  |
| ACH-2 Bulk Culture | chr5           | 95058107  |
| ACH-2 Bulk Culture | chr5           | 96097695  |
| ACH-2 Bulk Culture | chr5           | 100647070 |
| ACH-2 Bulk Culture | chr5           | 114588954 |
| ACH-2 Bulk Culture | chr5           | 171353583 |
| ACH-2 Bulk Culture | chr6           | 35329286  |
| ACH-2 Bulk Culture | chr6           | 79748418  |
| ACH-2 Bulk Culture | chr6           | 115805235 |
| ACH-2 Bulk Culture | chr6           | 117081995 |
| ACH-2 Bulk Culture | chr6           | 144758290 |
| ACH-2 Bulk Culture | chr6           | 150098036 |
| ACH-2 Bulk Culture | chr7           | 2757736   |
| ACH-2 Bulk Culture | chr7           | 33059398  |
| ACH-2 Bulk Culture | chr7           | 33059410  |
| ACH-2 Bulk Culture | chr7           | 35877117  |
| ACH-2 Bulk Culture | chr7           | 47461680  |
| ACH-2 Bulk Culture | chr7           | 128196939 |
| ACH-2 Bulk Culture | chr7           | 149791141 |
| ACH-2 Bulk Culture | chr7           | 150215720 |
| ACH-2 Bulk Culture | chr8           | 8955659   |
| ACH-2 Bulk Culture | chr8           | 52746047  |
| ACH-2 Bulk Culture | chr8           | 71434896  |
| ACH-2 Bulk Culture | chr8           | 132943766 |
| ACH-2 Bulk Culture | chr8           | 144440313 |
| ACH-2 Bulk Culture | chr8           | 145069685 |
| ACH-2 Bulk Culture | chr8           | 145523801 |
| ACH-2 Bulk Culture | chr8           | 145708617 |
| ACH-2 Bulk Culture | chr8           | 145725408 |
| ACH-2 Bulk Culture | chr9           | 33858052  |
| ACH-2 Bulk Culture | chr9           | 33869130  |
| ACH-2 Bulk Culture | chr9           | 37311637  |
| ACH-2 Bulk Culture | chr9           | 76940651  |
| ACH-2 Bulk Culture | chr9           | 89430772  |
| ACH-2 Bulk Culture | chr9           | 98714629  |
| ACH-2 Bulk Culture | chr9           | 98714656  |

| Samples            | Insertion Site |           |
|--------------------|----------------|-----------|
|                    | Chr            | Pos       |
| ACH-2 Bulk Culture | chr9           | 130873925 |
| ACH-2 Bulk Culture | chr9           | 132717975 |
| ACH-2 Bulk Culture | chr9           | 134045720 |
| ACH-2 Bulk Culture | chr9           | 135175101 |
| ACH-2 Bulk Culture | chr9           | 139708636 |
| ACH-2 Bulk Culture | chr9           | 140542540 |
| ACH-2 Bulk Culture | chr10          | 969989    |
| ACH-2 Bulk Culture | chr10          | 9238998   |
| ACH-2 Bulk Culture | chr10          | 46137671  |
| ACH-2 Bulk Culture | chr10          | 46138049  |
| ACH-2 Bulk Culture | chr10          | 71926808  |
| ACH-2 Bulk Culture | chr10          | 82261228  |
| ACH-2 Bulk Culture | chr10          | 91330906  |
| ACH-2 Bulk Culture | chr10          | 94746156  |
| ACH-2 Bulk Culture | chr10          | 101965515 |
| ACH-2 Bulk Culture | chr10          | 116542094 |
| ACH-2 Bulk Culture | chr10          | 123556557 |
| ACH-2 Bulk Culture | chr11          | 14508372  |
| ACH-2 Bulk Culture | chr11          | 14697775  |
| ACH-2 Bulk Culture | chr11          | 17199970  |
| ACH-2 Bulk Culture | chr11          | 18374835  |
| ACH-2 Bulk Culture | chr11          | 33140791  |
| ACH-2 Bulk Culture | chr11          | 62487067  |
| ACH-2 Bulk Culture | chr11          | 64539157  |
| ACH-2 Bulk Culture | chr11          | 72975727  |
| ACH-2 Bulk Culture | chr11          | 72975739  |
| ACH-2 Bulk Culture | chr11          | 75721231  |
| ACH-2 Bulk Culture | chr11          | 76190375  |
| ACH-2 Bulk Culture | chr11          | 96106826  |
| ACH-2 Bulk Culture | chr11          | 102954366 |
| ACH-2 Bulk Culture | chr12          | 1354128   |
| ACH-2 Bulk Culture | chr12          | 2469915   |
| ACH-2 Bulk Culture | chr12          | 10362108  |
| ACH-2 Bulk Culture | chr12          | 10504093  |
| ACH-2 Bulk Culture | chr12          | 31510258  |
| ACH-2 Bulk Culture | chr12          | 56332311  |
| ACH-2 Bulk Culture | chr12          | 75386048  |
| ACH-2 Bulk Culture | chr12          | 107401847 |
| ACH-2 Bulk Culture | chr12          | 110959918 |

| Samples            | Insertion Site |           |
|--------------------|----------------|-----------|
|                    | Chr            | Pos       |
| ACH-2 Bulk Culture | chr12          | 130226929 |
| ACH-2 Bulk Culture | chr13          | 27732929  |
| ACH-2 Bulk Culture | chr13          | 30816985  |
| ACH-2 Bulk Culture | chr13          | 32607392  |
| ACH-2 Bulk Culture | chr13          | 46594672  |
| ACH-2 Bulk Culture | chr13          | 67395941  |
| ACH-2 Bulk Culture | chr13          | 86362766  |
| ACH-2 Bulk Culture | chr13          | 88048817  |
| ACH-2 Bulk Culture | chr13          | 104909297 |
| ACH-2 Bulk Culture | chr13          | 114194056 |
| ACH-2 Bulk Culture | chr13          | 114194174 |
| ACH-2 Bulk Culture | chr14          | 21870064  |
| ACH-2 Bulk Culture | chr14          | 41692386  |
| ACH-2 Bulk Culture | chr14          | 50671220  |
| ACH-2 Bulk Culture | chr14          | 85871877  |
| ACH-2 Bulk Culture | chr14          | 97345386  |
| ACH-2 Bulk Culture | chr14          | 98252471  |
| ACH-2 Bulk Culture | chr14          | 103297202 |
| ACH-2 Bulk Culture | chr14          | 104050641 |
| ACH-2 Bulk Culture | chr15          | 42913210  |
| ACH-2 Bulk Culture | chr15          | 43127545  |
| ACH-2 Bulk Culture | chr15          | 43319347  |
| ACH-2 Bulk Culture | chr15          | 52449676  |
| ACH-2 Bulk Culture | chr15          | 62334057  |
| ACH-2 Bulk Culture | chr15          | 88654357  |
| ACH-2 Bulk Culture | chr15          | 88654491  |
| ACH-2 Bulk Culture | chr16          | 786079    |
| ACH-2 Bulk Culture | chr16          | 1631105   |
| ACH-2 Bulk Culture | chr16          | 1722380   |
| ACH-2 Bulk Culture | chr16          | 1739443   |
| ACH-2 Bulk Culture | chr16          | 1744159   |
| ACH-2 Bulk Culture | chr16          | 2309662   |
| ACH-2 Bulk Culture | chr16          | 14631354  |
| ACH-2 Bulk Culture | chr16          | 14693760  |
| ACH-2 Bulk Culture | chr16          | 18936002  |
| ACH-2 Bulk Culture | chr16          | 21635474  |
| ACH-2 Bulk Culture | chr16          | 21975902  |
| ACH-2 Bulk Culture | chr16          | 30766054  |
| ACH-2 Bulk Culture | chr16          | 67621530  |

| Samples            | Insertion Site |          |
|--------------------|----------------|----------|
|                    | Chr            | Pos      |
| ACH-2 Bulk Culture | chr16          | 70279313 |
| ACH-2 Bulk Culture | chr16          | 70600599 |
| ACH-2 Bulk Culture | chr16          | 82170888 |
| ACH-2 Bulk Culture | chr16          | 84768744 |
| ACH-2 Bulk Culture | chr16          | 89576064 |
| ACH-2 Bulk Culture | chr17          | 4819970  |
| ACH-2 Bulk Culture | chr17          | 5235608  |
| ACH-2 Bulk Culture | chr17          | 5329718  |
| ACH-2 Bulk Culture | chr17          | 8508839  |
| ACH-2 Bulk Culture | chr17          | 11928507 |
| ACH-2 Bulk Culture | chr17          | 19873918 |
| ACH-2 Bulk Culture | chr17          | 28005439 |
| ACH-2 Bulk Culture | chr17          | 32921147 |
| ACH-2 Bulk Culture | chr17          | 32921172 |
| ACH-2 Bulk Culture | chr17          | 33990727 |
| ACH-2 Bulk Culture | chr17          | 34147946 |
| ACH-2 Bulk Culture | chr17          | 35960565 |
| ACH-2 Bulk Culture | chr17          | 45226258 |
| ACH-2 Bulk Culture | chr17          | 52684391 |
| ACH-2 Bulk Culture | chr17          | 54321412 |
| ACH-2 Bulk Culture | chr17          | 54321470 |
| ACH-2 Bulk Culture | chr17          | 54931228 |
| ACH-2 Bulk Culture | chr17          | 59865434 |
| ACH-2 Bulk Culture | chr17          | 65117476 |
| ACH-2 Bulk Culture | chr17          | 76769280 |
| ACH-2 Bulk Culture | chr17          | 79525509 |
| ACH-2 Bulk Culture | chr17          | 79566657 |
| ACH-2 Bulk Culture | chr17          | 79836890 |
| ACH-2 Bulk Culture | chr17          | 80804474 |
| ACH-2 Bulk Culture | chr18          | 29102683 |
| ACH-2 Bulk Culture | chr18          | 67224803 |
| ACH-2 Bulk Culture | chr18          | 67224850 |
| ACH-2 Bulk Culture | chr19          | 1911023  |
| ACH-2 Bulk Culture | chr19          | 4947670  |
| ACH-2 Bulk Culture | chr19          | 11442822 |
| ACH-2 Bulk Culture | chr19          | 18251371 |
| ACH-2 Bulk Culture | chr19          | 19133715 |
| ACH-2 Bulk Culture | chr19          | 19915076 |
| ACH-2 Bulk Culture | chr19          | 34815023 |

| Samples            | Insertion Site |           |
|--------------------|----------------|-----------|
|                    | Chr            | Pos       |
| ACH-2 Bulk Culture | chr19          | 36644746  |
| ACH-2 Bulk Culture | chr19          | 48710581  |
| ACH-2 Bulk Culture | chr19          | 49590168  |
| ACH-2 Bulk Culture | chr19          | 49637022  |
| ACH-2 Bulk Culture | chr19          | 50127695  |
| ACH-2 Bulk Culture | chr19          | 50431117  |
| ACH-2 Bulk Culture | chr19          | 54063941  |
| ACH-2 Bulk Culture | chr19          | 55749560  |
| ACH-2 Bulk Culture | chr20          | 3206189   |
| ACH-2 Bulk Culture | chr20          | 33370058  |
| ACH-2 Bulk Culture | chr20          | 34295035  |
| ACH-2 Bulk Culture | chr20          | 37889916  |
| ACH-2 Bulk Culture | chr21          | 35159708  |
| ACH-2 Bulk Culture | chr21          | 38801454  |
| ACH-2 Bulk Culture | chr21          | 43070490  |
| ACH-2 Bulk Culture | chr21          | 47636548  |
| ACH-2 Bulk Culture | chr22          | 41205155  |
| ACH-2 Bulk Culture | chr22          | 41560372  |
| ACH-2 Bulk Culture | chr22          | 41606733  |
| ACH-2 Bulk Culture | chr22          | 50808564  |
| ACH-2 Bulk Culture | chrX           | 47011700  |
| ACH-2 Bulk Culture | chrX           | 96020219  |
| ACH-2 Bulk Culture | chrX           | 108512169 |
| ACH-2 Bulk Culture | chrX           | 110993207 |
| ACH-2 Bulk Culture | chrX           | 112246365 |
| ACH-2 Clone        | chr7           | 33059398  |
| ACH-2 Clone        | chr7           | 33059407  |
| ACH-2 Clone        | chr7           | 51379529  |
| ACH-2 Clone        | chr21          | 15884097  |
| Bcl-2 Model        | chr1           | 23908123  |
| Bcl-2 Model        | chr1           | 27026447  |
| Bcl-2 Model        | chr1           | 32485507  |
| Bcl-2 Model        | chr1           | 32599881  |
| Bcl-2 Model        | chr1           | 36451221  |
| Bcl-2 Model        | chr1           | 41584468  |
| Bcl-2 Model        | chr1           | 44148657  |
| Bcl-2 Model        | chr1           | 93605190  |
| Bcl-2 Model        | chr1           | 161080045 |
| Bcl-2 Model        | chr1           | 162553455 |

| Samples     | Insertion Site |           |
|-------------|----------------|-----------|
|             | Chr            | Pos       |
| Bcl-2 Model | chr1           | 171489411 |
| Bcl-2 Model | chr1           | 198575352 |
| Bcl-2 Model | chr1           | 243353615 |
| Bcl-2 Model | chr2           | 69886686  |
| Bcl-2 Model | chr2           | 74177076  |
| Bcl-2 Model | chr2           | 86405510  |
| Bcl-2 Model | chr2           | 100099502 |
| Bcl-2 Model | chr2           | 148729871 |
| Bcl-2 Model | chr2           | 157351161 |
| Bcl-2 Model | chr2           | 158340282 |
| Bcl-2 Model | chr2           | 190665339 |
| Bcl-2 Model | chr2           | 190863049 |
| Bcl-2 Model | chr2           | 197710864 |
| Bcl-2 Model | chr2           | 200798810 |
| Bcl-2 Model | chr2           | 221802652 |
| Bcl-2 Model | chr3           | 23794012  |
| Bcl-2 Model | chr3           | 51462604  |
| Bcl-2 Model | chr3           | 107523036 |
| Bcl-2 Model | chr3           | 124944654 |
| Bcl-2 Model | chr3           | 197484610 |
| Bcl-2 Model | chr4           | 39178007  |
| Bcl-2 Model | chr4           | 82977544  |
| Bcl-2 Model | chr4           | 103225056 |
| Bcl-2 Model | chr4           | 143348166 |
| Bcl-2 Model | chr4           | 174295299 |
| Bcl-2 Model | chr5           | 21510307  |
| Bcl-2 Model | chr5           | 43645568  |
| Bcl-2 Model | chr5           | 118862457 |
| Bcl-2 Model | chr5           | 134129697 |
| Bcl-2 Model | chr5           | 142788604 |
| Bcl-2 Model | chr5           | 154295632 |
| Bcl-2 Model | chr5           | 156631249 |
| Bcl-2 Model | chr5           | 180679876 |
| Bcl-2 Model | chr6           | 2839249   |
| Bcl-2 Model | chr6           | 33673679  |
| Bcl-2 Model | chr6           | 74230954  |
| Bcl-2 Model | chr6           | 79777675  |
| Bcl-2 Model | chr6           | 99393590  |
| Bcl-2 Model | chr6           | 152497744 |

| Samples     | Insertion Site |           |
|-------------|----------------|-----------|
|             | Chr            | Pos       |
| Bcl-2 Model | chr6           | 163832040 |
| Bcl-2 Model | chr7           | 7961607   |
| Bcl-2 Model | chr7           | 33714289  |
| Bcl-2 Model | chr7           | 44094370  |
| Bcl-2 Model | chr7           | 99813543  |
| Bcl-2 Model | chr7           | 138788335 |
| Bcl-2 Model | chr7           | 149138415 |
| Bcl-2 Model | chr7           | 155509393 |
| Bcl-2 Model | chr8           | 54656745  |
| Bcl-2 Model | chr8           | 79430838  |
| Bcl-2 Model | chr8           | 109906782 |
| Bcl-2 Model | chr8           | 121474484 |
| Bcl-2 Model | chr8           | 133751878 |
| Bcl-2 Model | chr8           | 145042760 |
| Bcl-2 Model | chr8           | 146006174 |
| Bcl-2 Model | chr9           | 15549880  |
| Bcl-2 Model | chr9           | 26939288  |
| Bcl-2 Model | chr9           | 36364904  |
| Bcl-2 Model | chr9           | 123686115 |
| Bcl-2 Model | chr9           | 130937918 |
| Bcl-2 Model | chr9           | 131455796 |
| Bcl-2 Model | chr9           | 139306981 |
| Bcl-2 Model | chr9           | 139920312 |
| Bcl-2 Model | chr9           | 140574807 |
| Bcl-2 Model | chr9           | 140625580 |
| Bcl-2 Model | chr9           | 140632307 |
| Bcl-2 Model | chr10          | 79140546  |
| Bcl-2 Model | chr10          | 104465789 |
| Bcl-2 Model | chr11          | 335875    |
| Bcl-2 Model | chr11          | 65231562  |
| Bcl-2 Model | chr11          | 66917282  |
| Bcl-2 Model | chr11          | 81596144  |
| Bcl-2 Model | chr11          | 88044449  |
| Bcl-2 Model | chr11          | 108152645 |
| Bcl-2 Model | chr11          | 114323996 |
| Bcl-2 Model | chr11          | 118206087 |
| Bcl-2 Model | chr12          | 4296984   |
| Bcl-2 Model | chr12          | 50069878  |
| Bcl-2 Model | chr12          | 56501861  |

| Samples     | Insertion Site |           |
|-------------|----------------|-----------|
|             | Chr            | Pos       |
| Bcl-2 Model | chr12          | 57061447  |
| Bcl-2 Model | chr12          | 57464338  |
| Bcl-2 Model | chr12          | 102182824 |
| Bcl-2 Model | chr12          | 113691951 |
| Bcl-2 Model | chr12          | 121318071 |
| Bcl-2 Model | chr12          | 122331858 |
| Bcl-2 Model | chr12          | 123680890 |
| Bcl-2 Model | chr13          | 28834577  |
| Bcl-2 Model | chr13          | 37597406  |
| Bcl-2 Model | chr13          | 41943025  |
| Bcl-2 Model | chr13          | 60680597  |
| Bcl-2 Model | chr13          | 73311449  |
| Bcl-2 Model | chr13          | 75897721  |
| Bcl-2 Model | chr14          | 22429657  |
| Bcl-2 Model | chr14          | 23543559  |
| Bcl-2 Model | chr14          | 52336155  |
| Bcl-2 Model | chr14          | 81658714  |
| Bcl-2 Model | chr15          | 50447595  |
| Bcl-2 Model | chr15          | 63833770  |
| Bcl-2 Model | chr15          | 64850939  |
| Bcl-2 Model | chr15          | 90146253  |
| Bcl-2 Model | chr15          | 101126873 |
| Bcl-2 Model | chr16          | 4753769   |
| Bcl-2 Model | chr16          | 21988319  |
| Bcl-2 Model | chr16          | 27425224  |
| Bcl-2 Model | chr16          | 28182077  |
| Bcl-2 Model | chr16          | 30467940  |
| Bcl-2 Model | chr16          | 57036552  |
| Bcl-2 Model | chr16          | 88728543  |
| Bcl-2 Model | chr16          | 88763696  |
| Bcl-2 Model | chr17          | 17959982  |
| Bcl-2 Model | chr17          | 41233293  |
| Bcl-2 Model | chr17          | 42499481  |
| Bcl-2 Model | chr17          | 42519322  |
| Bcl-2 Model | chr17          | 60024646  |
| Bcl-2 Model | chr17          | 60133653  |
| Bcl-2 Model | chr17          | 61822365  |
| Bcl-2 Model | chr17          | 73293508  |
| Bcl-2 Model | chr17          | 74050959  |

| Samples     | Insertion Site |          |
|-------------|----------------|----------|
|             | Chr            | Pos      |
| Bcl-2 Model | chr17          | 74184479 |
| Bcl-2 Model | chr17          | 76151787 |
| Bcl-2 Model | chr17          | 78929533 |
| Bcl-2 Model | chr17          | 79553108 |
| Bcl-2 Model | chr17          | 79814616 |
| Bcl-2 Model | chr18          | 2966681  |
| Bcl-2 Model | chr18          | 48476607 |
| Bcl-2 Model | chr19          | 556003   |
| Bcl-2 Model | chr19          | 1018490  |
| Bcl-2 Model | chr19          | 1057723  |
| Bcl-2 Model | chr19          | 1405242  |
| Bcl-2 Model | chr19          | 3555172  |
| Bcl-2 Model | chr19          | 15496236 |
| Bcl-2 Model | chr19          | 15587939 |
| Bcl-2 Model | chr19          | 16256972 |
| Bcl-2 Model | chr19          | 18692398 |
| Bcl-2 Model | chr19          | 35766579 |
| Bcl-2 Model | chr19          | 36243634 |
| Bcl-2 Model | chr19          | 44265291 |
| Bcl-2 Model | chr19          | 50070798 |
| Bcl-2 Model | chr19          | 50893504 |
| Bcl-2 Model | chr19          | 54086647 |
| Bcl-2 Model | chr19          | 59068978 |
| Bcl-2 Model | chr20          | 3985325  |
| Bcl-2 Model | chr20          | 31395590 |
| Bcl-2 Model | chr20          | 43652560 |
| Bcl-2 Model | chr20          | 58511079 |
| Bcl-2 Model | chr20          | 62357321 |
| Bcl-2 Model | chr20          | 62357327 |
| Bcl-2 Model | chr20          | 62620265 |
| Bcl-2 Model | chr21          | 14360140 |
| Bcl-2 Model | chr21          | 15416941 |
| Bcl-2 Model | chr21          | 37724517 |
| Bcl-2 Model | chr21          | 47888940 |
| Bcl-2 Model | chr21          | 47898721 |
| Bcl-2 Model | chr22          | 38358801 |
| Bcl-2 Model | chr22          | 41363962 |
| Bcl-2 Model | chr22          | 42482848 |
| Bcl-2 Model | chr22          | 42505259 |

| Samples               | Insertion Site |           |
|-----------------------|----------------|-----------|
|                       | Chr            | Pos       |
| Bcl-2 Model           | chr22          | 50954497  |
| Bcl-2 Model           | chrX           | 21407472  |
| Bcl-2 Model           | chrX           | 53771101  |
| Bcl-2 Model           | chrX           | 54246042  |
| Bcl-2 Model           | chrX           | 56563900  |
| Bcl-2 Model           | chrX           | 109312096 |
| Bcl-2 Model           | chrX           | 154263042 |
| T <sub>CM</sub> Model | chr1           | 25768302  |
| T <sub>CM</sub> Model | chr1           | 80245485  |
| T <sub>CM</sub> Model | chr1           | 106406504 |
| T <sub>CM</sub> Model | chr1           | 109837441 |
| T <sub>CM</sub> Model | chr1           | 115142538 |
| T <sub>CM</sub> Model | chr1           | 194305888 |
| T <sub>CM</sub> Model | chr1           | 211624359 |
| T <sub>CM</sub> Model | chr2           | 26642701  |
| T <sub>CM</sub> Model | chr2           | 48556042  |
| T <sub>CM</sub> Model | chr2           | 168977183 |
| T <sub>CM</sub> Model | chr2           | 218507257 |
| T <sub>CM</sub> Model | chr2           | 238679610 |
| T <sub>CM</sub> Model | chr3           | 130261883 |
| T <sub>CM</sub> Model | chr3           | 142567295 |
| T <sub>CM</sub> Model | chr3           | 148149745 |
| T <sub>CM</sub> Model | chr3           | 164896119 |
| T <sub>CM</sub> Model | chr4           | 5674956   |
| T <sub>CM</sub> Model | chr4           | 111003731 |
| T <sub>CM</sub> Model | chr4           | 146824251 |
| T <sub>CM</sub> Model | chr4           | 168791421 |
| T <sub>CM</sub> Model | chr5           | 11065433  |
| T <sub>CM</sub> Model | chr5           | 121418329 |
| T <sub>CM</sub> Model | chr6           | 136103931 |
| T <sub>CM</sub> Model | chr7           | 33059398  |
| T <sub>CM</sub> Model | chr7           | 45084508  |
| T <sub>CM</sub> Model | chr8           | 56494994  |
| T <sub>CM</sub> Model | chr8           | 89377015  |

| Samples               | Insertion Site |           |
|-----------------------|----------------|-----------|
|                       | Chr            | Pos       |
| T <sub>CM</sub> Model | chr8           | 104244670 |
| T <sub>CM</sub> Model | chr8           | 146056655 |
| T <sub>CM</sub> Model | chr10          | 96762938  |
| T <sub>CM</sub> Model | chr10          | 104050644 |
| T <sub>CM</sub> Model | chr10          | 105195598 |
| T <sub>CM</sub> Model | chr11          | 14552052  |
| T <sub>CM</sub> Model | chr11          | 28148365  |
| T <sub>CM</sub> Model | chr11          | 47001492  |
| T <sub>CM</sub> Model | chr12          | 23793489  |
| T <sub>CM</sub> Model | chr12          | 27186358  |
| T <sub>CM</sub> Model | chr12          | 126947612 |
| T <sub>CM</sub> Model | chr12          | 132212695 |
| T <sub>CM</sub> Model | chr13          | 96843839  |
| T <sub>CM</sub> Model | chr15          | 60137691  |
| T <sub>CM</sub> Model | chr15          | 101171550 |

|                       |       |           |
|-----------------------|-------|-----------|
| T <sub>CM</sub> Model | chr16 | 11629331  |
| T <sub>CM</sub> Model | chr16 | 78579721  |
| T <sub>CM</sub> Model | chr17 | 53245540  |
| T <sub>CM</sub> Model | chr17 | 70568067  |
| T <sub>CM</sub> Model | chr17 | 74505826  |
| T <sub>CM</sub> Model | chr17 | 80358905  |
| T <sub>CM</sub> Model | chr17 | 80498695  |
| T <sub>CM</sub> Model | chr19 | 2265267   |
| T <sub>CM</sub> Model | chr19 | 14242164  |
| T <sub>CM</sub> Model | chr19 | 31652543  |
| T <sub>CM</sub> Model | chr19 | 31652603  |
| T <sub>CM</sub> Model | chr19 | 31985555  |
| T <sub>CM</sub> Model | chr21 | 47948781  |
| T <sub>CM</sub> Model | chrX  | 66288341  |
| T <sub>CM</sub> Model | chrX  | 108374206 |
| J-Lat Cells           | chr19 | 46884365  |
